# Supplementary material
Source: PubMed Central journal article supplement (PMC5066844)
Supplement: NIHMS69943-supplement-Supplementary_info.pdf [file NIHMS69943-supplement-Supplementary_info.pdf]

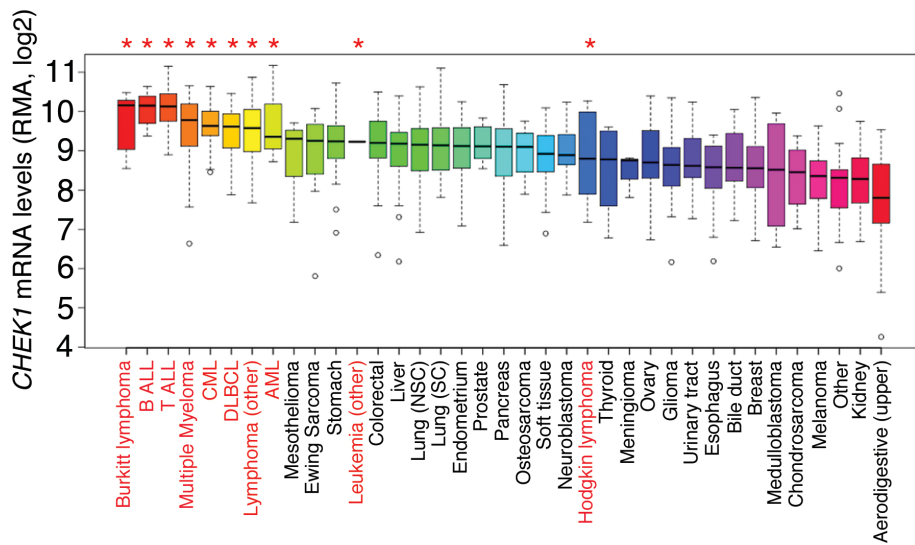

**Fig. S1. *CHEK1* mRNA expression is highest in lymphomas and leukemias.** The figure represents the expression levels of *CHK1* mRNA in a large variety of human cancer cell lines extracted from the Cancer Cell Line Encyclopedia (<http://www.broadinstitute.org/ccle/home>). Leukemias and lymphomas are marked in red, and with an asterisk on top of the panel. Expression is shown as RMA (Robust Multichip Average) on a log2 scale.

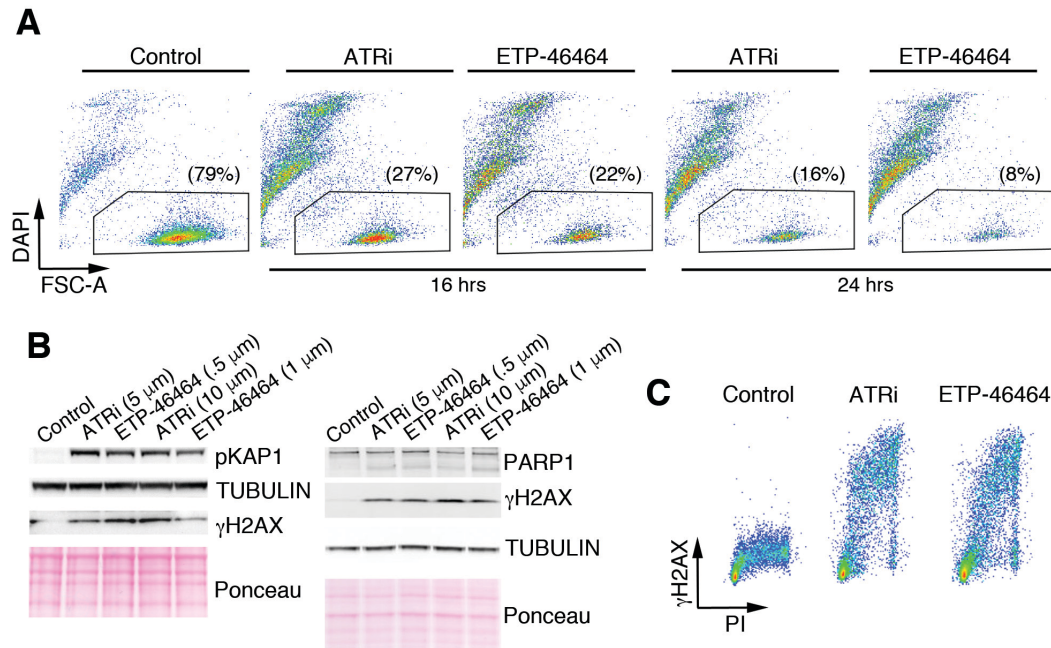

**Fig. S2. Toxicity, replication stress, and DNA breakage induced by two distinct ATR inhibitors in AML<sup>MLL</sup> cells.** (A) FACS analysis showing the percentage of viable AML<sup>MLL</sup> cells (identified by size and DAPI exclusion) either untreated or exposed to ATRi (10  $\mu$ M) or to ETP-46464 (1  $\mu$ M), an independent ATR inhibitor previously described by our group (Toledo *et al* Nat Struct Mol Biol 2011) for the indicated times. (B) Western blots showing markers of DNA breakage and cellular toxicity. The left Western blot shows KAP1 and  $\gamma$ H2AX phosphorylation in AML<sup>MLL</sup> cells exposed to ATRi or ETP-46464 at the indicated conditions. The right blot shows the accumulation of PARP1 cleavage (lower bands) products in cells with DNA damage indicated by  $\gamma$ H2AX phosphorylation. (C) FACS analysis of DNA content (PI) and  $\gamma$ H2AX phosphorylation in AML<sup>MLL</sup> cells exposed to ATRi (10  $\mu$ M, 6 hrs) or ETP-46464 (1  $\mu$ M, 6 hrs), illustrating that the  $\gamma$ H2AX signal detectable by Western blot is restricted to replicating cells.
